# Supplementary material
Source: HighWire-hosted journal article supplement (https://jnis.bmj.com/content/11/1/20)
Supplement: inline-supplementary-material-2 [file inline-supplementary-material-2.xlsx]

## Sheet: Tabelle1
Successfull reperfusion
	Active			Controls
Study name	N1	Cases	Non-cases	N2	Cases	Non-cases
Broeg-Morvay et al*	40	35	5	40	31	9
Wang et al	138	127	11	138	113	25
Weber et al (IVT-E)	70	52	18	105	76	29
Sanak et al	179	156	23	193	156	37
Coutinho et al	124	105	19	151	127	24
Abilleira et al	599	455	144	567	449	118
Kaesmacher et al	79	59	20	160	139	21
Behme et al	27	18	9	66	59	7
Guedin et al	40	29	11	28	27	1
Maier et al	28	15	13	81	59	22
Rai et al	52	35	17	38	31	7
Leker et al	33	28	5	24	21	3
Alonso de Leciñana et al	21	17	4	53	48	5
Davalos et al	69	56	13	73	64	9
Nogueira et al	179	134	45	136	101	35
Weber et al (IVT-IN)	75	54	21	105	76	29
Wee et al	29	27	2	21	19	2
Mulder et al	29	18	11	168	98	70
Goyal et al	44	35	9	116	83	33
Jovin et al	33	25	8	69	42	27
mRS at day 90
	Active			Controls
	N1	Cases	Non-cases	N2	Cases	Non-cases
Study name
Broeg-Morvay et al*	40	17	23	40	17	23
Wang et al	138	56	82	138	62	76
Weber et al (IVT-E)	70	34	36	105	37	68
Sanak et al	179	93	86	193	85	108
Coutinho et al	128	61	67	156	90	66
Abilleira et al	599	271	328	567	267	300
Guedin et al	40	21	19	28	19	9
Maier et al	24	6	18	74	35	39
Rai et al	52	26	26	38	22	16
Leker et al	29	17	12	21	10	11
Minnerup et al	356	136	220	432	205	227
Alonso de Leciñana et al	21	9	12	53	36	17
Davalos et al	67	28	39	74	49	25
Nogueira et al	179	62	117	136	71	65
Weber et al (IVT-IN)	75	24	51	105	37	68
Mulder et al	30	7	23	203	69	134
Goyal et al	45	26	19	119	61	58
Jovin et al	33	14	19	70	31	39
sICH
	Active			Controls
	N1	Cases	Non-cases	N2	Cases	Non-cases
Study name
Broeg-Morvay et al*	40	1	39	40	1	39
Wang et al	138	19	119	138	18	120
Weber et al (IVT-E)	70	2	68	105	6	99
Sanak et al	179	7	172	193	8	185
Coutinho et al	131	5	126	160	2	158
Abilleira et al	599	16	583	567	19	548
Guedin et al	40	2	38	28	2	26
Maier et al	28	2	26	81	3	78
Leker et al	33	0	33	24	2	22
Alonso de Leciñana et al	21	0	21	53	3	50
Davalos et al	58	3	55	66	2	64
Nogueira et al	179	16	163	136	16	120
Weber et al (IVT-IN)	75	3	72	105	6	99
Widimsky et al	84	3	81	31	2	29
Mulder et al	30	2	28	203	16	187
Goyal et al	45	1	44	120	5	115
Jovin et al	33	0	33	70	2	68
Any ICH	Active			Controls
	N1	Cases	Non-cases	N2	Cases	Non-cases
Study name
Broeg-Morvay et al*	40	5	35	40	14	26
Wang et al	138	39	99	138	62	76
Weber et al (IVT-E)	70	7	63	105	12	93
Sanak et al	179	22	157	193	25	168
Coutinho et al	131	36	95	160	48	112
Kaesmacher et al	79	32	47	160	44	116
Maier et al	28	5	23	81	15	66
Leker et al	33	5	28	24	5	19
Minnerup et al	504	74	430	603	95	508
Alonso de Leciñana et al	21	1	20	53	7	46
Davalos et al	58	15	43	66	14	52
Weber et al (IVT-IN)	75	10	65	105	12	93
Wee et al	29	2	27	21	1	20
Mulder et al	30	0	30	203	2	201
Goyal et al	45	17	28	120	38	82
Jovin et al	33	6	27	70	7	63
Mortality	Active			Controls
	N1	Cases	Non-cases	N2	Cases	Non-cases
Study name
Broeg-Morvay et al*	40	8	32	40	19	21
Wang et al	138	35	103	138	33	105
Weber et al (IVT-E)	70	18	52	105	28	77
Sanak et al	179	41	138	193	44	149
Coutinho et al	131	16	115	160	13	147
Abilleira et al	599	106	493	567	93	474
Guedin et al	40	7	33	28	3	25
Maier et al	28	5	23	81	14	67
Leker et al	29	3	26	21	3	18
Rai et al	52	13	39	38	4	34
Minnerup et al	467	130	337	574	102	472
Alonso de Leciñana et al	21	3	18	53	2	51
Davalos et al	67	16	51	74	13	61
Nogueira et al	179	61	118	136	33	103
Weber et al (IVT-IN)	75	28	47	105	28	77
Mulder et al	30	10	20	203	39	164
Goyal et al	45	9	36	120	8	112
Jovin et al	33	6	27	70	13	57
Afib
	Active			Controls
Study name	N1	Cases	Non-cases	N2	Cases	Non-cases
Weber et al (IVT-E)	70	25	45	105	26	79
Coutinho et al	131	62	69	160	53	107
Abilleira et al	599	244	355	567	130	437
Maier et al	28	15	13	81	30	51
Rai et al	52	24	28	38	10	28
Leker et al	33	22	11	24	8	16
Minnerup et al	504	231	273	603	225	378
Alonso de Leciñana et al	21	11	10	53	12	41
Nogueira et al	179	80	99	136	54	82
Weber et al (IVT-IN)	75	31	44	105	26	79
Wee et al	29	17	12	21	9	12
Mulder et al	55	30	25	445	105	340
Jovin et al	33	19	14	70	16	54
Goyal et al	45	24	21	120	37	83
Hypertension
	Active			Controls
Study name	N1	Cases	Non-cases	N2	Cases	Non-cases
Weber et al (IVT-E)	70	49	21	105	82	23
Coutinho et al	131	87	44	160	99	61
Abilleira et al	599	382	217	567	352	215
Guedin	40	17	23	28	11	17
Maier et al	28	23	5	81	61	20
Rai et al	52	38	14	38	21	17
Leker et al	33	22	11	24	16	8
Minnerup et al	504	382	122	603	461	142
Alonso de Leciñana et al	21	11	10	53	28	25
Nogueira et al	179	142	37	136	99	37
Weber et al (IVT-IN)	75	55	20	105	82	23
Wee et al	29	21	8	21	13	8
Mulder et al	55	33	22	445	194	251
Jovin et al	33	17	16	70	45	25
Goyal et al	45	27	18	120	78	42
Previos cerebrovascular events
	Active			Controls
Study name	N1	Cases	Non-cases	N2	Cases	Non-cases
Weber et al (IVT-E)	70	14	56	105	13	92
Coutinho et al	131	30	101	160	25	135
Abilleira et al	599	87	512	567	44	523
Leker et al	33	7	26	24	2	22
Minnerup et al	504	104	400	603	77	526
Alonso de Leciñana et al	21	3	18	53	5	48
Weber et al (IVT-IN)	75	20	55	105	13	92
Wee et al	29	3	26	21	5	16
Mulder et al	55	11	44	445	43	402
Jovin et al	33	8	25	70	4	66
Goyal et al	45	13	32	120	16	104
Diabetes
	Active			Controls
Study name	N1	Cases	Non-cases	N2	Cases	Non-cases
Weber et al (IVT-E)	70	11	59	105	16	89
Coutinho et al	131	32	99	160	22	138
Abilleira et al	599	96	503	567	127	440
Guedin et al	40	2	38	28	2	26
Maier et al	28	9	19	81	23	58
Rai et al	52	15	37	38	7	31
Leker et al	53	7	46	24	9	15
Minnerup et al	504	93	411	603	118	485
Alonso de Leciñana et al	21	4	17	53	8	45
Nogueira et al	179	46	133	136	31	105
Weber et al (IVT-IN)	75	17	58	105	16	89
Wee et al	29	10	19	21	4	17
Mulder et al	55	12	43	445	56	389
Jovin et al	33	8	25	70	14	56
Goyal et al	45	5	40	120	28	92
Age
	Active			Controls
Study name	N1	Mean	StDev	N2	Mean	StDev
Webet et al (IVT-E)	70	70.7	17.1	105	70.2	12.6
Sanak et al	179	65.5	12.4	193	62.9	13.8
Coutinho et al	131	69	12	160	67	13
Abilleira et al	599	68.1	13.5	567	68.6	12.8
Kaesmacher et al	79	73.3	12.4	160	69.8	15.5
Guedin et al	40	64.6	15.3	28	69.2	13.5
Rai et al	52	69	18	38	63	19
Leker et al	33	64.4	14.7	24	66.8	13.7
Minnerup et al	504	68.3	13.7	603	68.7	14.7
Davalos et al	67	66.4	13.6	74	66.2	12.7
Nogueira et al	179	67.7	14	136	67.3	16
Weber et al (IVT-IN)	75	68	12.4	105	70.2	12.6
Wee et al	29	71	14	21	73	16
Jovin et al	33	65.6	10.7	70	65.8	11.7
Goyal et al	45	70.9	16	120	69.6	12.3
TICI3
	Active			Controls
Study name	N1	Cases	Non-cases	N2	Cases	Non-cases
Broeg-Morvay et al*	40	28	12	40	28	12
Sanak et al	179	83	96	193	80	113
Coutinho et al	124	66	58	151	86	65
Kaesmacher et al	79	30	49	160	65	95
Guedin et al	40	22	18	28	24	4
Davalos et al	69	25	44	73	27	46
Nogueira et al	179	73	106	136	56	80
Goyal et al	44	12	32	116	26	90
Jovin et al	33	7	26	69	12	57
